# Supplementary material for: Awareness, Experience, and Knowledge of Farming Households in Rural Bangladesh Regarding Mold Contamination of Food Crops: A Cross-Sectional Study
Source: MDPI journal article supplement (doi:10.3390/ijerph181910335), 2021-09-30
Supplement: s1 [file s1]

**Supplementary Table S1a: Mold and mycotoxin knowledge questions and scoring criteria.**

| Question                            |                                                                                                   | Response                                            | Scoring | Total |
|-------------------------------------|---------------------------------------------------------------------------------------------------|-----------------------------------------------------|---------|-------|
| <i>Contamination and conditions</i> |                                                                                                   |                                                     |         |       |
| k<br>1                              | Can molds (“Chhatrak” or “Chita” or “Maista” or “Maiska” or “Kalo Dag”) be present in farm crops? | No                                                  | 0       | 1     |
|                                     |                                                                                                   | Yes                                                 | 1       |       |
|                                     |                                                                                                   | Don't know                                          | 0       |       |
| k<br>2                              | At what stage of crop production can mold contamination occur?                                    | Before harvesting                                   | 1       | 3     |
|                                     |                                                                                                   | During harvesting                                   | 1       |       |
|                                     |                                                                                                   | Post-harvest and storage                            | 1       |       |
|                                     |                                                                                                   | Don't Know                                          | 0       |       |
| k<br>3                              | Can you tell me of any conditions before harvesting that may promote mold contamination?          | None mentioned                                      | 0       | 8     |
|                                     |                                                                                                   | Repeated planting of the same crop on the same plot | 1       |       |
|                                     |                                                                                                   | Bad or inappropriate seeds                          | 1       |       |
|                                     |                                                                                                   | High temperatures                                   | 1       |       |
|                                     |                                                                                                   | Drought                                             | 1       |       |
|                                     |                                                                                                   | Crops attacked by pests.                            | 1       |       |
|                                     |                                                                                                   | Sowing in a field that still has old harvest debris | 1       |       |
|                                     |                                                                                                   | Overcrowding due to poor inter-plant spacing        | 1       |       |
|                                     |                                                                                                   | Too many weeds in crops                             | 1       |       |
|                                     |                                                                                                   | Doesn't know                                        | 0       |       |
| k<br>4                              | Can you tell me of any conditions during harvesting that may promote mold contamination?          | None mentioned                                      | 0       | 9     |
|                                     |                                                                                                   | Harvesting with dirty containers                    | 1       |       |
|                                     |                                                                                                   | Harvesting with moist containers                    | 1       |       |
|                                     |                                                                                                   | Harvesting with moldy containers                    | 1       |       |
|                                     |                                                                                                   | Harvesting with insect-infested containers          | 1       |       |
|                                     |                                                                                                   | Damaged grain or produce                            | 1       |       |

|                                                            |                                                                                                        |                                                                 |   |   |
|------------------------------------------------------------|--------------------------------------------------------------------------------------------------------|-----------------------------------------------------------------|---|---|
|                                                            |                                                                                                        | When there is soil left on pods after harvesting                | 1 |   |
|                                                            |                                                                                                        | Leaving in damaged grains / foreign matter from harvested crops | 1 |   |
|                                                            |                                                                                                        | High levels of rain during the harvesting period                | 1 |   |
|                                                            |                                                                                                        | Delayed or late harvesting                                      | 1 |   |
|                                                            |                                                                                                        | Doesn't know                                                    | 0 |   |
| k<br>5                                                     | Can you tell me of any conditions during post-harvest and storage that may promote mold contamination? | None mentioned                                                  | 0 | 8 |
|                                                            |                                                                                                        | Heaping wet, freshly harvested crops for long periods           | 1 |   |
|                                                            |                                                                                                        | Limited circulation of air through the storage area             | 1 |   |
|                                                            |                                                                                                        | Storing grains without protection from rain or groundwater      | 1 |   |
|                                                            |                                                                                                        | Storing grains without drainage                                 | 1 |   |
|                                                            |                                                                                                        | Storing grains in a wet environment                             | 1 |   |
|                                                            |                                                                                                        | Rodents, poultry, or other birds in the storage area            | 1 |   |
|                                                            |                                                                                                        | Storing grains in wet and/or unclean bags                       | 1 |   |
|                                                            |                                                                                                        | Storing bags of grains directly on the floor                    | 1 |   |
|                                                            |                                                                                                        | Doesn't know                                                    | 0 |   |
| <i>Harmful effects of mold and mycotoxin contamination</i> |                                                                                                        |                                                                 |   |   |
| k<br>6                                                     | How does mold contamination affect farm crops?                                                         | No changes                                                      | 0 | 5 |
|                                                            |                                                                                                        | Crops change in color                                           | 1 |   |
|                                                            |                                                                                                        | Crops change in taste                                           | 1 |   |
|                                                            |                                                                                                        | Crops change in smell                                           | 1 |   |
|                                                            |                                                                                                        | Reduced harvest quantities                                      | 1 |   |
|                                                            |                                                                                                        | Reduced market value                                            | 1 |   |
|                                                            |                                                                                                        | Don't know                                                      | 0 |   |
| k<br>7                                                     | Are there any harmful effects of giving farm animals feed prepared from moldy grains?                  | No                                                              | 0 | 1 |
|                                                            |                                                                                                        | Yes                                                             | 1 |   |
|                                                            |                                                                                                        | Don't know                                                      | 0 |   |
|                                                            | What are some of these harmful effects in animals?                                                     | Reduces production of milk or eggs                              | 1 | 7 |

|                      |                                                                                 |                                                                 |   |   |
|----------------------|---------------------------------------------------------------------------------|-----------------------------------------------------------------|---|---|
| k<br>8               |                                                                                 | Reduces weight gain and growth                                  | 1 |   |
|                      |                                                                                 | Causes fever                                                    | 1 |   |
|                      |                                                                                 | Causes death                                                    | 1 |   |
|                      |                                                                                 | causes diarrhea                                                 | 1 |   |
|                      |                                                                                 | reduced feeding                                                 | 1 |   |
|                      |                                                                                 | Other gastrointestinal disturbances                             | 1 |   |
|                      |                                                                                 | None mentioned                                                  | 0 |   |
| k<br>9               | Can molds that contaminate rice and other staple crops produce some toxins?     | No                                                              | 0 | 1 |
|                      |                                                                                 | Yes                                                             | 1 |   |
|                      |                                                                                 | Don't know                                                      | 0 |   |
| k<br>10              | Can these toxins still be present in prepared foods on the table after harvest? | No                                                              | 0 | 1 |
|                      |                                                                                 | Yes                                                             | 1 |   |
|                      |                                                                                 | Don't know                                                      | 0 |   |
| k<br>11              | Are there any harmful effects of toxins on humans?                              | No                                                              | 0 | 1 |
|                      |                                                                                 | Yes                                                             | 1 |   |
|                      |                                                                                 | Don't know                                                      | 0 |   |
| k<br>12              | Can you name any of these harmful effects on humans?                            | Chronic liver diseases                                          | 1 | 5 |
|                      |                                                                                 | Reduced growth of children                                      | 1 |   |
|                      |                                                                                 | causes diarrhea                                                 | 1 |   |
|                      |                                                                                 | Other gastrointestinal disturbances                             | 1 |   |
|                      |                                                                                 | Cancers                                                         | 1 |   |
|                      |                                                                                 | None mentioned                                                  | 0 |   |
| Preventive practices |                                                                                 |                                                                 |   |   |
| k<br>13              | Can you tell me anything you do before harvesting to reduce mold contamination? | Nothing                                                         | 0 | 9 |
|                      |                                                                                 | Maintaining a crop rotation schedule                            | 1 |   |
|                      |                                                                                 | Preparing the seedbed by plowing under or removing debris       | 1 |   |
|                      |                                                                                 | Using soil tests to determine fertilizer/soil conditioner needs | 1 |   |
|                      |                                                                                 | Select healthy seeds                                            | 1 |   |
|                      |                                                                                 | Growing recommended seed varieties for my farm area             | 1 |   |

|         |                                                                                                             |                                                                                                         |   |    |
|---------|-------------------------------------------------------------------------------------------------------------|---------------------------------------------------------------------------------------------------------|---|----|
|         |                                                                                                             | Timing crop planting to avoid high temperature                                                          | 1 |    |
|         |                                                                                                             | Timing crop planting to avoid drought stress during the period of seed development and maturation       | 1 |    |
|         |                                                                                                             | Maintaining the recommended row and intra-plant spacing.                                                | 1 |    |
|         |                                                                                                             | Spraying pesticides                                                                                     | 1 |    |
|         |                                                                                                             | Doesn't know                                                                                            | 0 |    |
| k<br>14 | Can you tell me anything you do during harvesting to reduce mold contamination?                             | Nothing                                                                                                 | 0 | 7  |
|         |                                                                                                             | Harvesting with clean containers                                                                        | 1 |    |
|         |                                                                                                             | Harvesting with dry containers                                                                          | 1 |    |
|         |                                                                                                             | Not collecting grains that are damaged                                                                  | 1 |    |
|         |                                                                                                             | Avoiding contact of the grain with soil                                                                 | 1 |    |
|         |                                                                                                             | Measuring the moisture content of harvested grain                                                       | 1 |    |
|         |                                                                                                             | Drying the crop immediately after harvest.                                                              | 1 |    |
|         |                                                                                                             | Cleaning freshly harvested cereals to remove damaged kernels and other foreign matter.                  | 1 |    |
|         |                                                                                                             | Don't know                                                                                              | 0 |    |
| k<br>15 | Can you tell me of any measure you implement during post-harvest and storage to prevent mold contamination? | Nothing                                                                                                 | 0 | 15 |
|         |                                                                                                             | Not keeping freshly harvested commodities in heaps for more than a few hours before drying or threshing | 1 |    |
|         |                                                                                                             | Maintaining air circulation through the grain storage area                                              | 1 |    |
|         |                                                                                                             | Storing grains in a dry, well-vented structure                                                          | 1 |    |
|         |                                                                                                             | Storing grains protected from rain                                                                      | 1 |    |
|         |                                                                                                             | Storing grains in an area with water drainage                                                           | 1 |    |
|         |                                                                                                             | Storing grains protected from rodents/birds                                                             | 1 |    |
|         |                                                                                                             | Protecting the grain storage area from temperature fluctuations                                         | 1 |    |
|         |                                                                                                             | Cooling the crops as quickly as possible after drying                                                   | 1 |    |
|         |                                                                                                             | Storing crops above the floor or with a water-impermeable layer                                         | 1 |    |
|         |                                                                                                             | Checking moisture content of grain at regular intervals                                                 | 1 |    |
|         |                                                                                                             | Checking the temperature of stored grain at regular intervals                                           | 1 |    |

|  |  |                                      |   |           |
|--|--|--------------------------------------|---|-----------|
|  |  | Using insecticides                   | 1 |           |
|  |  | Using fungicides                     | 1 |           |
|  |  | Cleaning the storage area frequently | 1 |           |
|  |  | Using preservatives                  | 1 |           |
|  |  | Don't know                           | 0 |           |
|  |  | <b>Total maximum score</b>           |   | <b>81</b> |

Supplementary Table S1b: Knowledge level categorization.

| Knowledge category                        | Max score   | Low  | Fair  | Good |
|-------------------------------------------|-------------|------|-------|------|
| Contamination and conditions              | 29.0        | 0-9  | 9-17  | ≥18  |
| Harmful effects                           | 21.0        | 0-6  | 6-11  | ≥12  |
| Preventive practices                      | 31.0        | 0-9  | 9-18  | ≥19  |
| Total maximum score                       | <b>81.0</b> | 0-23 | 24-47 | ≥48  |
|                                           |             |      |       |      |
| Criteria for categorizing knowledge level |             |      |       |      |
| Low knowledge (less than 30%)             |             |      |       |      |
| Fair knowledge (30-59%)                   |             |      |       |      |
| Good (≥60%)                               |             |      |       |      |

**Supplementary Table S2: Crude associations of socio-demographic characteristics with overall knowledge.**

| Socio-demographic characteristics                          | N    | Overall knowledge score |              | P-value* |
|------------------------------------------------------------|------|-------------------------|--------------|----------|
|                                                            |      | Crude $\beta$           | 95% CI       |          |
| Hindu religion (reference= Muslim)                         | 1280 | -0.79                   | -2.81, 1.23  | 0.44     |
| Household wealth (reference = lowest two quintiles)        | 1277 |                         |              |          |
| middle quintile                                            |      | 0.68                    | -0.64, 2.01  | 0.31     |
| upper quintile                                             |      | 0.83                    | -0.60, 2.25  | 0.25     |
| wealthiest quintile                                        |      | 1.17                    | -0.44, 2.78  | 0.15     |
| Household head's education (reference = no education)      | 1278 |                         |              |          |
| Partial primary                                            |      | -0.56                   | -1.56, 0.43  | 0.27     |
| Complete primary                                           |      | 0.41                    | -0.93, 1.75  | 0.55     |
| Partial secondary                                          |      | -0.16                   | -1.36, 1.05  | 0.80     |
| Complete secondary or more                                 |      | 1.22                    | -0.74, 3.18  | 0.22     |
| Household head is female (reference = male)                | 1280 | -1.37                   | -3.46, 0.71  | 0.20     |
| Household head's main occupation (reference = rice farmer) |      |                         |              |          |
| No income                                                  | 1280 | -0.07                   | -1.62, 1.49  | 0.93     |
| Farmer (not paddy)                                         |      | -2.05                   | -4.37, 0.28  | 0.08     |
| Unskilled day laborer                                      |      | -1.35                   | -2.55, -0.14 | 0.03     |
| Skilled day laborer                                        |      | -1.81                   | -3.87, 0.25  | 0.09     |
| Transport                                                  |      | -0.78                   | -2.67, 1.11  | 0.42     |
| Salaried/Professional                                      |      | 0.19                    | -1.77, 2.15  | 0.85     |
| Businessman                                                |      | -0.34                   | -1.74, 1.06  | 0.63     |
| Remittances                                                |      | -2.32                   | -4.11, -0.52 | 0.01     |
| Other                                                      |      | -2.58                   | -4.89, -0.27 | 0.03     |
| Own livestock/poultry ownership                            | 1280 | 0.85                    | 0.06, 1.63   | 0.03     |
| FAARM intervention group (vs. control)                     | 1280 | 2.18                    | 0.84, 3.52   | 0.001    |
| Household head's age (per year older)                      | 1280 | 0.04                    | 0.01, 0.07   | 0.01     |

|                                     |      |       |             |        |
|-------------------------------------|------|-------|-------------|--------|
| Homestead land size                 | 1262 |       |             |        |
| reference= <10 decimal              |      |       |             |        |
| 10 - 19                             |      | 1.08  | 0.15, 2.02  | 0.02   |
| 20 - 29                             |      | 0.90  | -0.77, 2.57 | 0.29   |
| 30 - 39                             |      | 3.62  | 1.08, 6.15  | 0.01   |
| ≥ 40                                |      | 3.22  | 1.32, 5.12  | 0.001  |
| Agricultural land size              |      |       |             |        |
| (reference= <20 decimal)            |      |       |             |        |
| 20-50                               | 1280 | 0.51  | -1.18, 2.21 | 0.55   |
| 51-100                              |      | 0.76  | -0.61, 2.14 | 0.28   |
| 100-200                             |      | 0.78  | -0.40, 1.96 | 0.20   |
| > 200                               |      | 2.02) | 1.14, 2.91  | <0.001 |
| Household size                      | 1280 | 0.26  | 0.13, 0.40  |        |
| (reference= Small i.e. 2-4 members) |      |       |             |        |
| Medium (5-10 members)               |      | 1.025 | 0.29, 1.76  | 0.01   |
| Large (>10 members)                 |      | 2.016 | 0.43, 3.61  | 0.01   |

Mixed-effects bivariable linear regression applying sampling probability weights;  $\beta$ - beta coefficient;

95% CI- 95% confidence interval; \*p-values for Wald test; A decimal is 1/100th of an acre or around 40 square meters
